# Supplementary material for: Temperature dependence of Cu–Al spinel formation and its catalytic performance in methanol steam reforming
Source: Royal Society of Chemistry journal article supplement (doi:10.1039/c7cy01236e), 2017-01-01
Supplement: c7cy01236e1.pdf [file c7cy01236e1.pdf]

## Supplementary material

### **Temperature dependence of Cu-Al spinel formation and its catalytic performance in methanol steam reforming**

Yajie Liu<sup>a,c</sup>, Shaojun Qing<sup>a</sup>, Xiaoning Hou<sup>a</sup>, Fajie Qin<sup>a,c</sup>, Xiang Wang<sup>b</sup>, Zhixian Gao<sup>a\*</sup>, Hongwei Xiang<sup>a</sup>

<sup>a</sup> Institute of Coal Chemistry, Chinese Academy of Sciences, Taiyuan 030001, China E-mail: [gaozx@sxicc.ac.cn](mailto:gaozx@sxicc.ac.cn)

<sup>b</sup> Institute of Applied Chemistry, College of Chemistry, Nanchang University, Nanchang 330031, China

<sup>c</sup> University of Chinese Academy of Sciences, Beijing 100049, China

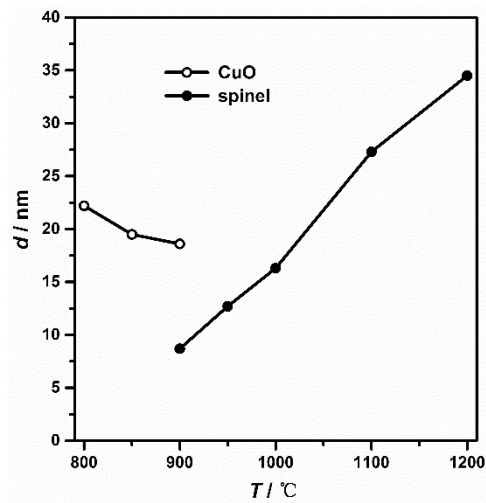

**Fig. S1.** Crystallite size of CuO and of spinel phase as a function of calcination temperature for CAT samples. (Average crystallite diameter of spinels, which were calculated by means of the Scherrer equation applied to the six main diffraction peaks, showing a nearly linear increase from 8.7 to 34.5 nm between 900-1200 °C. The size of CuO decreases from 800 to 900 °C, and the CuO phase disappears from XRD patterns at 950 °C and above)

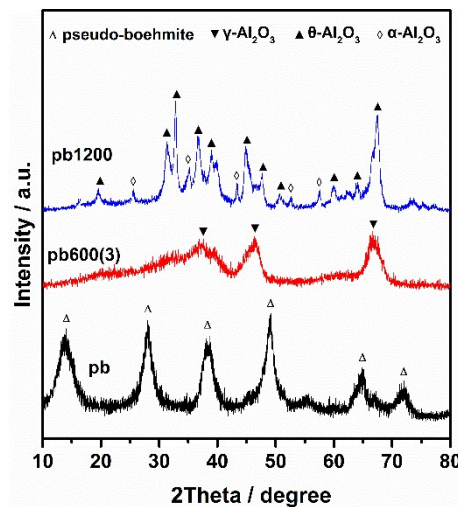

**Fig. S2.** XRD patterns of pseudo-boehmite (pb) and its heated products. (pb600(3) represented that pseudo-boehmite was calcined from *RT* to 600 °C and kept for 3h, and pb1200 indicated pseudo-boehmite was calcined from *RT* to 1200 °C and cooled down naturally.)

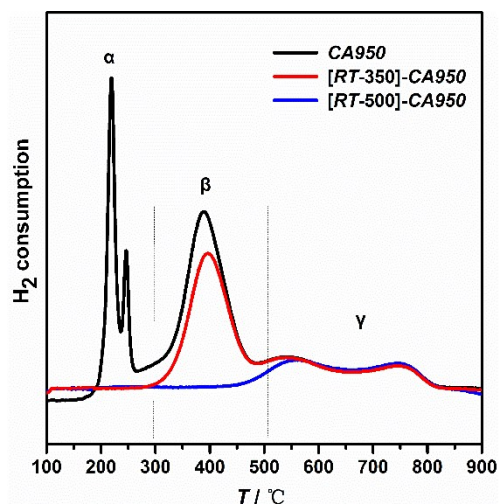

**Fig. S3.** H<sub>2</sub>-TPR profiles of CA950 and treated ones under different conditions for the purpose of identifying the possible formation of CuAlO<sub>2</sub> phase as an intermediate during spinel reduction. (CA950 represented non-treated CA950 reduced from RT to 900 °C. [RT-350]-CA950 represented that CA950 was reduced from RT to 350 °C followed by a formal TPR from RT to 900 °C, and similarly [RT-500]-CA950 indicated the pre-reduction was performed from RT to 500 °C. The obtained profiles show nearly the identical  $\gamma$ -peak, suggesting  $\gamma$ -peak is not a secondary reduction of an intermediate, which is supported by XRD data as shown in Fig. S4)

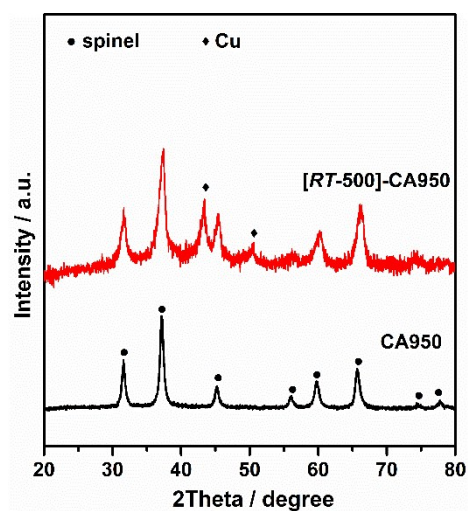

**Fig. S4.** XRD patterns of CA950 and [RT-500]-CA950, indicating the absence of CuAlO<sub>2</sub> phase in Cu-Al spinel solid solution.

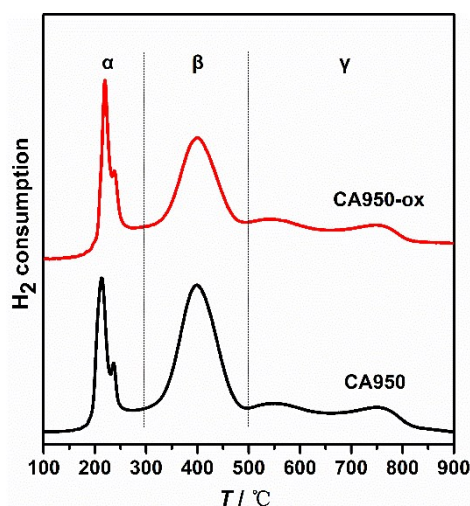

**Fig. S5.** H<sub>2</sub>-TPR profiles of CA950 and CA950-ox, indicating the absence of CuAlO<sub>2</sub> phase in Cu-Al spinel solid solution. (CA950-ox represented that CA950 was oxidized in 80% O<sub>2</sub>/N<sub>2</sub>, the oxidation temperature condition was same as calcination of CA950 in air)

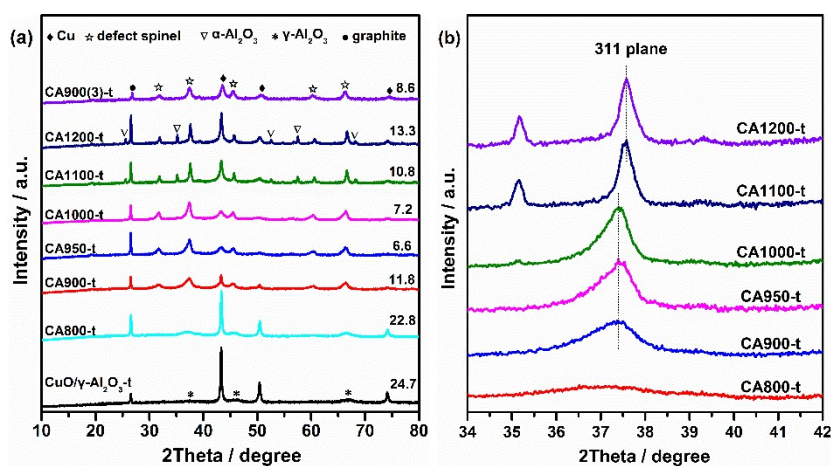

**Fig. S6.** XRD patterns of tested Cu-Al spinel catalysts **(a)** and details of 311 plane of Cu-Al defect spinel **(b)**. (The CA950 generates the smallest copper particles (6.6 nm) after MSR test. The 2theta values of CA900-t, CA950-t and CA1000-t almost peak at the same position with broadened peak width but higher values with narrowed peak width for CA1100-t and CA1200-t. This indicates that the content of remaining Cu in spinel structure after MSR is higher for low temperature calcined samples)

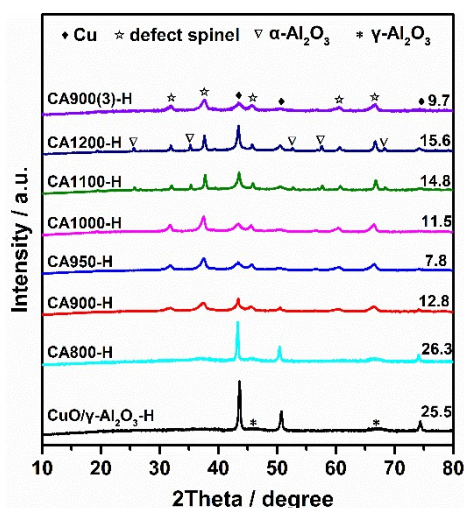

**Fig. S7.** XRD patterns of reduced Cu-Al spinel catalysts and copper particle size in nm calculated by the Scherrer equation. (CAT-H represented that the sample CAT was reduced in H<sub>2</sub> from RT to 500 °C and kept for 20 min. The CA950-t produces the smallest copper particles (7.8 nm) after reduction treatment.)

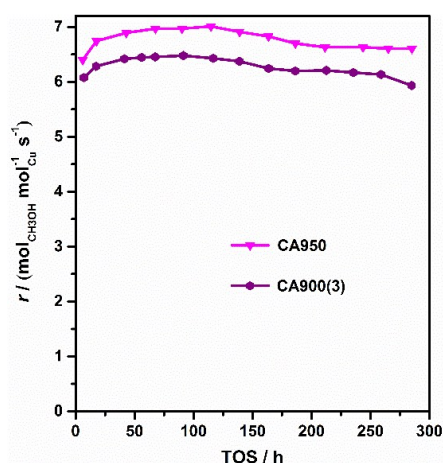

**Fig. S8.** Comparison of CH<sub>3</sub>OH conversion rate in MSR over CAT catalysts that contained nearly the same content of Cu-Al spinel. (As CA900(3) owns the same spinel content and similar reducibility with CA950, but a lower catalytic activity. Thus, it can be concluded that a large surface area may also contribute to the catalytic action.)

**Table S1.** Comparison of the conversion rate ( $r_1$ ) and intrinsic activity ( $r_2$ )

| TOF                                                                                      | CA800 | CA900 | CA950 | CA1000 | CA1100 | CA1200 | CA900(3) |
|------------------------------------------------------------------------------------------|-------|-------|-------|--------|--------|--------|----------|
| $r_1$ [mol <sub>CH<sub>3</sub>OH</sub> mol <sup>-1</sup> Cu h <sup>-1</sup> ]            | 3.08  | 4.47  | 6.53  | 5.85   | 5.55   | 5.39   | 5.87     |
| $r_2 \times 10^3$ [mol <sub>CH<sub>3</sub>OH</sub> m <sup>-2</sup> NPs h <sup>-1</sup> ] | 7.10  | 5.56  | 4.60  | 4.45   | 5.99   | 7.08   | 5.32     |
